# Supplementary material for: Gold nanoparticle modified NiTi composite nanosheet coating for efficient and selective solid phase microextraction of polycyclic aromatic hydrocarbons
Source: Royal Society of Chemistry journal article supplement (doi:10.1039/c6ay01322h), 2016-01-01
Supplement: c6ay01322h1.pdf [file c6ay01322h1.pdf]

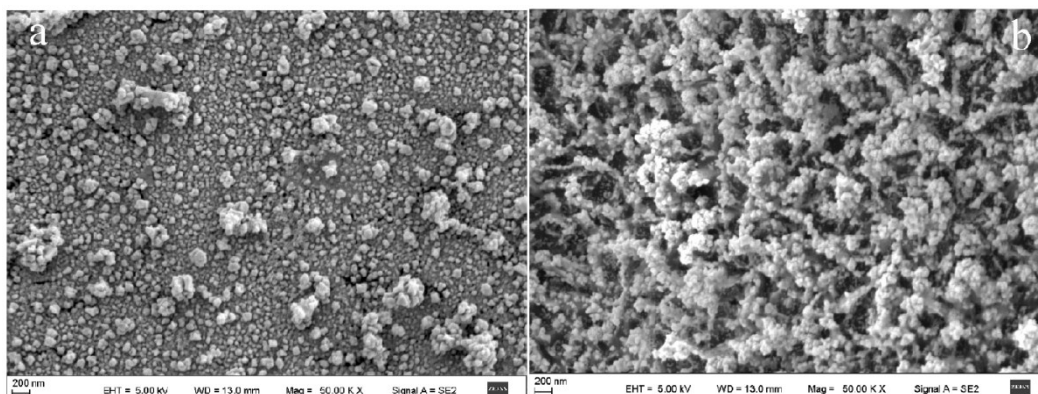

**Fig. S1** SEM micrographs of AuNPs electrodeposited on the pretreated NiTi wire (a) and the hydrothermally treated NiTi wire (b).

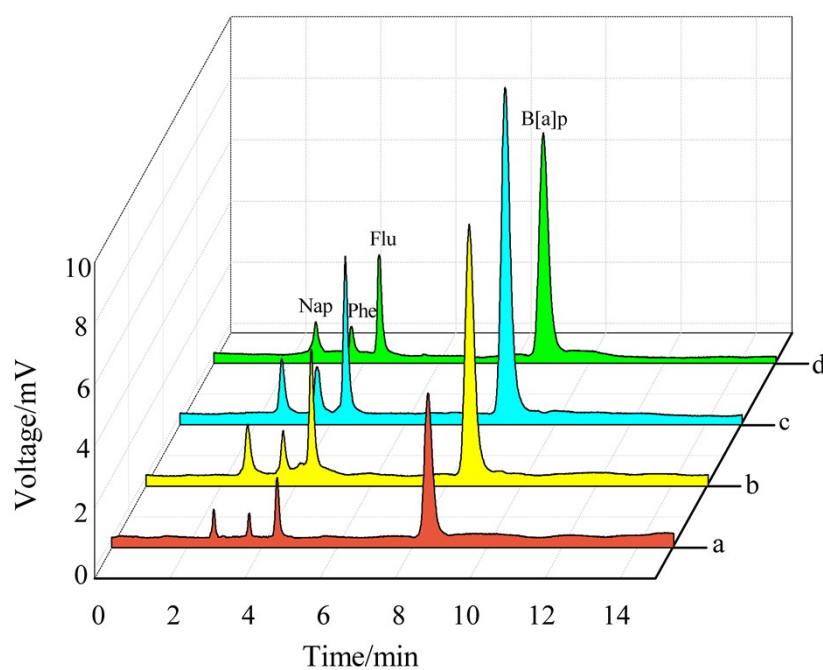

**Fig. S2** Typical chromatograms of different fibers with AuNPs electrodeposited within 5 min (a), 10 min (b), 15 min (c) and 20 min (d). Conditions: Temperature, 45 °C; Stirring, 350 r/min; Extraction, 30 min; Desorption, 5 min; Nap, Phe, Flu and B[a]p, 50 µg/L.
